# Supplementary material
Source: HighWire-hosted journal article supplement (https://srh.bmj.com/content/46/3/218)
Supplement: inline-supplementary-material-1 [file inline-supplementary-material-1.pdf]

**1 Appendix A:**

2

3 ICPC-2 codes – Contraception related problem defined as:

4

? Pregnancy

Admin;GP management plan

Advice/education;Pap smear

Advice/education;Webster pack

Advice/education;contracept;F

Advice/education;pregnancy

Advice/education;reproductiv;F

Advice/education;sex

Advice/education;travel

Bleeding;breakthru(contracept)

Change (in);medication

Check up

Check up;IUCD

Check up;adult health;complete

Check up;gynaecological

Check up;postnatal

Check up;postpartum

Complication;implant(s)

Contraception;Depo progesteron

Contraception;F

Contraception;IUD

Contraception;OC pill

Contraception;implant

Contraception;injection

Contraception;other method

Contraception;postpartum

Contraception;vaginal ring

Counselling;family planning;F

Counselling;problem;reproduc

Encounter;other

Health maintenance

Insert;implant;contraception

Insertion;IUCD

Medication(s)

Medication;prevent

Medication;renew

Medication;renew;endoc/metabol

Medication;renew;genital;F

Medication;renew;reproductive

Medication;request

Medication;request;endoc/metab

Medication;request;genital;F

Medication;request;reproduct

Medications;reproductive  
Missed;OC pill  
Prescription(s)  
Prescription;reproductive  
Problem;IUCD  
Problem;OCP  
Problem;contraception  
Progesterone only pill  
Referral;family planning  
Removal;IUCD  
Remove;implant;contraception  
Review;medication  
Side-effect;medication  
Unprotected sex; F

5
