# Supplementary material
Source: HighWire-hosted journal article supplement (https://srh.bmj.com/content/46/3/218)
Supplement: inline-supplementary-material-2 [file inline-supplementary-material-2.pdf]

**Appendix B:**

*The following ATC codes defined 'LARC':*

G03AC08 – etonogestrel (contraceptive implant)  
G03AC03 – levonorgestrel (IUD with progesterone)  
G03AC06 – medroxyprogesterone (depot)  
G02BA01 – plastic IUD  
G02BA02 – plastic IUD with copper  
G02BA03 – plastic IUD with progesterone

*The following ATC codes defined 'non-LARC':*

G03HB01 – cyproterone and estrogen (COCP)  
G03AC03 – levonorgestrel (POP)  
G03AC01 – norethisterone (POP)  
G03AA07 – levonorgestrel and ethinylestradiol (COCP-fixed)  
G03AB03 – levonorgestrel and ethinylestradiol (COCP – sequential)  
G03AA14 – norgestrel and estradiol (COCP)  
G03AA16 – dienogest and ethinylestradiol (COCP-fixed)  
G03AB08 – dienogest and estradiol (COCP-sequential)  
G03AA05 – norethisterone and ethinylestradiol (COCP-fixed)  
G03AA10 – gestodene and ethinylestradiol (COCP – fixed)  
G03AA12 – drospirenone and ethinylestradiol (COCP – fixed)  
G03AA09 – desogestrel and ethinylestradiol (COCP-fixed)  
G02BB01 – vaginal ring with progestogen and estrogen
