# Supplementary material
Source: HighWire-hosted journal article supplement (https://srh.bmj.com/content/46/3/218)
Supplement: inline-supplementary-material-3 [file inline-supplementary-material-3.pdf]

## Appendix C

Electronic sources utilised by GP registrars prescribing LARC

| Source                                                       | Frequency | Percentage |
|--------------------------------------------------------------|-----------|------------|
| Family Planning Organisation website                         | 50        | 36.8       |
| Australian Medicines Handbook                                | 23        | 16.9       |
| Australian Therapeutic Guidelines                            | 20        | 14.7       |
| Monthly Index of Medical Specialities (MIMS)                 | 15        | 11.0       |
| Drug company website                                         | 7         | 5.1        |
| Royal Australian College of General Practitioners guidelines | 5         | 3.7        |
| Murtagh's General Practice Online                            | 2         | 1.5        |
| Practice Software                                            | 2         | 1.5        |
| Royal Women's Hospital website                               | 2         | 1.5        |
| Health Pathways                                              | 2         | 1.5        |
| Jean Hailes website                                          | 1         | 0.7        |
| Pharmaceutical Benefits Scheme website                       | 1         | 0.7        |
| UpToDate                                                     | 1         | 0.7        |
| Other, unspecified                                           | 5         | 3.7        |
