# Supplementary material
Source: HighWire-hosted journal article supplement (https://srh.bmj.com/content/46/3/218)
Supplement: inline-supplementary-material-4 [file inline-supplementary-material-4.pdf]

## Appendix D

Characteristics associated with Australian GP Registrars' prescribing of LARC versus all other problems 2010-2017.

| Variable                             | Class            | No           | Yes        | p      |
|--------------------------------------|------------------|--------------|------------|--------|
| Patient age group                    | 12-18 years      | 13856 (10%)  | 168 (12%)  | <0.001 |
|                                      | 19-25 years      | 25559 (19%)  | 382 (28%)  |        |
|                                      | 26-35 years      | 35560 (26%)  | 452 (33%)  |        |
|                                      | 36-45 years      | 31054 (23%)  | 283 (21%)  |        |
|                                      | 46-55 years      | 28267 (21%)  | 71 (5%)    |        |
| Aboriginal or Torres Strait Islander | No               | 123927 (98%) | 1240 (97%) | 0.06   |
|                                      | Yes              | 2355 (2%)    | 34 (3%)    |        |
| NESB                                 | No               | 117234 (92%) | 1216 (94%) | 0.02   |
|                                      | Yes              | 10004 (8%)   | 75 (6%)    |        |
| Patient/practice status              | Existing patient | 55958 (43%)  | 546 (41%)  | 0.21   |
|                                      | New to registrar | 65678 (50%)  | 678 (51%)  |        |
|                                      | New to practice  | 9774 (7%)    | 112 (8%)   |        |
| Registrar gender                     | Male             | 34368 (26%)  | 281 (21%)  | <0.001 |
|                                      | Female           | 99928 (74%)  | 1075 (79%) |        |
| Registrar FT or PT                   | Part-time        | 32437 (25%)  | 338 (26%)  | 0.50   |
|                                      | Full-time        | 98514 (75%)  | 972 (74%)  |        |
| Term                                 | Term 1           | 54100 (40%)  | 530 (39%)  | 0.48   |
|                                      | Term 2           | 47784 (36%)  | 477 (35%)  |        |
|                                      | Term 3           | 32412 (24%)  | 349 (26%)  |        |
| Qualified as doctor in Australia     | No               | 20766 (16%)  | 232 (17%)  | 0.10   |
|                                      | Yes              | 112742 (84%) | 1113 (83%) |        |
| Post-grad qualifications             | No               | 122085 (92%) | 1196 (89%) | 0.002  |
|                                      | Yes              | 11080 (8%)   | 145 (11%)  |        |
| Practice size                        | Small            | 44787 (34%)  | 475 (36%)  | 0.23   |
|                                      | Large            | 85710 (66%)  | 844 (64%)  |        |
| Practice routinely bulk bills        | No               | 99807 (75%)  | 1024 (77%) | 0.46   |
|                                      | Yes              | 32781 (25%)  | 313 (23%)  |        |
| Rurality                             | Major city       | 84858 (63%)  | 712 (53%)  | <0.001 |
|                                      | Inner regional   | 31613 (24%)  | 393 (29%)  |        |

| Variable                 | Class                                 | No           | Yes        | p      |
|--------------------------|---------------------------------------|--------------|------------|--------|
|                          | Outer regional / remote / very remote | 17503 (13%)  | 250 (18%)  |        |
| New problem seen         | No                                    | 51936 (42%)  | 551 (45%)  | 0.07   |
|                          | Yes                                   | 71594 (58%)  | 679 (55%)  |        |
| Sought help any source   | No                                    | 113092 (84%) | 1087 (80%) | <0.001 |
|                          | Yes                                   | 21204 (16%)  | 269 (20%)  |        |
| Learning goals generated | No                                    | 106008 (83%) | 1077 (83%) | 0.50   |
|                          | Yes                                   | 22197 (17%)  | 213 (17%)  |        |
| Registrar age            | mean (SD)                             | 32 (6)       | 32 (6)     | 0.17   |
| Year of graduation       | mean (SD)                             | 2008 (5)     | 2008 (5)   | 0.64   |
| SEIFA index              | mean (SD)                             | 6 (3)        | 5 (3)      | <0.001 |
| Consultation duration    | mean (SD)                             | 20 (10)      | 20 (11)    | 0.31   |

*FT, full time, PT, part time*

*SEIFA, Socio-economic Indexes for Areas*

*NESB, Non-English speaking background*

*Bulk billing = no out of pocket expense to patient for consultation*
