# Supplementary material
Source: HighWire-hosted journal article supplement (https://srh.bmj.com/content/46/3/218)
Supplement: inline-supplementary-material-5 [file inline-supplementary-material-5.pdf]

## Appendix E

Associations of Australian GP registrars' prescription of LARC versus all other problems 2010-2017 -univariate and multivariable logistic regression

| Factor group         | Variable                 | Class                                 | Univariate        |        | Adjusted          |        |
|----------------------|--------------------------|---------------------------------------|-------------------|--------|-------------------|--------|
|                      |                          |                                       | OR (95% CI)       | p      | OR (95% CI)       | p      |
| Patient factors      | Patient age group        | 19-25 years                           | 1.24 (1.02, 1.50) | 0.0291 | 1.20 (0.98, 1.46) | 0.080  |
|                      |                          | 26-35 years                           | 1.05 (0.87, 1.27) | 0.5952 | 1.03 (0.85, 1.24) | 0.80   |
|                      |                          | 36-45 years                           | 0.75 (0.62, 0.92) | 0.0043 | 0.73 (0.60, 0.90) | 0.003  |
|                      |                          | 46-55 years                           | 0.21 (0.16, 0.28) | <.0001 | 0.19 (0.14, 0.27) | <.0001 |
|                      | NESB                     | Yes                                   | 0.74 (0.57, 0.95) | 0.0198 | 0.71 (0.53, 0.94) | 0.019  |
| Registrar factors    | Registrar age            |                                       | 0.99 (0.98, 1.00) | 0.1706 | 0.99 (0.98, 1.00) | 0.084  |
|                      | Registrar gender         | Female                                | 1.31 (1.14, 1.51) | 0.0001 | 1.34 (1.15, 1.55) | <.0001 |
|                      | Post-grad qualifications | Yes                                   | 1.35 (1.11, 1.63) | 0.0021 | 1.32 (1.09, 1.61) | 0.005  |
| Practice factors     | Rurality                 | Inner regional                        | 1.48 (1.29, 1.70) | <.0001 | 1.50 (1.29, 1.75) | <.0001 |
|                      |                          | Outer regional / remote / very remote | 1.71 (1.47, 1.98) | <.0001 | 1.65 (1.38, 1.96) | <.0001 |
|                      | SEIFA index              |                                       | 0.95 (0.93, 0.97) | <.0001 | 0.97 (0.95, 0.99) | 0.007  |
| Consultation factors | New problem seen         | Yes                                   | 0.89 (0.79, 1.01) | 0.0685 | 0.86 (0.76, 0.97) | 0.014  |
|                      | Sought help any source   | Yes                                   | 1.34 (1.16, 1.53) | <.0001 | 1.31 (1.12, 1.52) | <.0001 |

SEIFA, Socio-economic Indexes for Areas

NESB, Non-English speaking background
